# Supplementary material
Source: publisher figshare collection journal article supplement (https://acs.figshare.com/ndownloader/files/5302369)
Supplement: Supplementary file 1 [file 5302369]

## Supporting Information

### Aerogel Microparticles from Oil-in-Oil Emulsion Systems

*Senlong Gu, Chunhao Zhai, and Sadhan C. Jana\**

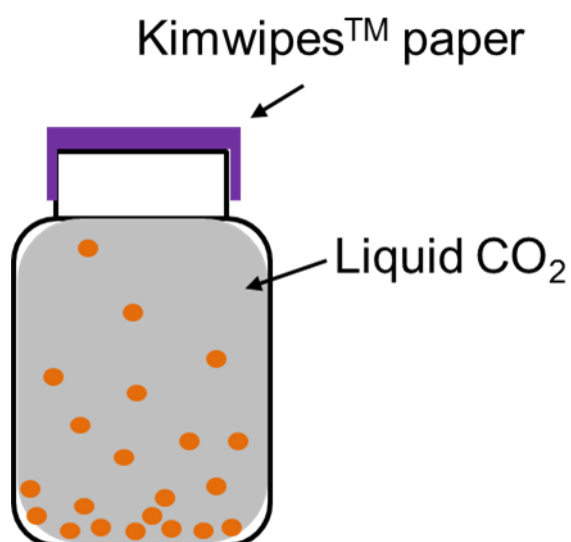

**Figure S1.** Container with gel microparticles when filled with liquid CO<sub>2</sub> in the vessel of supercritical dryer.

**Note:** In the supercritical drying process, acetone in the gel needs to be exchanged with liquid CO<sub>2</sub> in the supercritical dryer. Neck of the container was covered by Kimwipes™ paper. Liquid CO<sub>2</sub> can flow into the container when the vessel is fulfilled by liquid CO<sub>2</sub>. In this process, the particles can be retained in the container because that pores of Kimwipes™ paper are smaller than the diameter of the gel particles. After this step, the supercritical dryer was heated to 50 °C and waited for 60 min before pressure release.

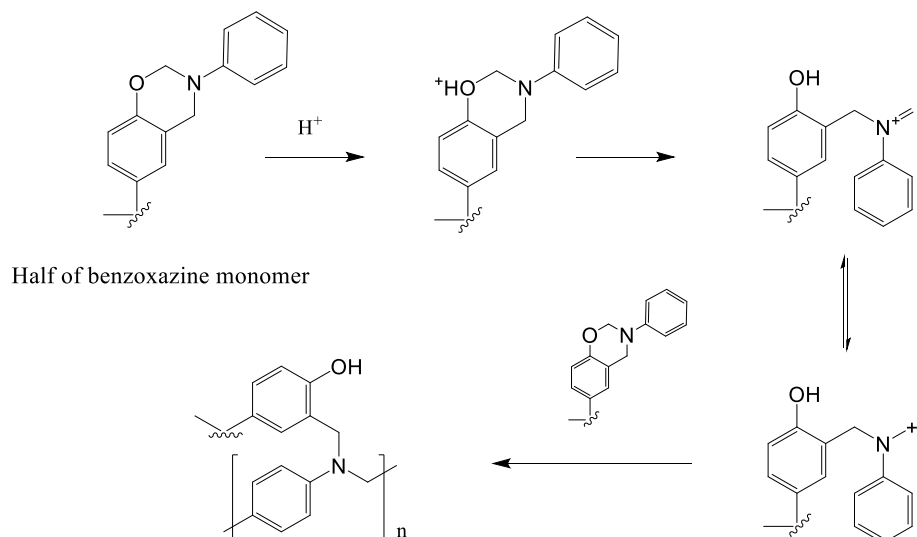

**Scheme S1. Mechanism of HCl-catalyzed polymerization of benzoxazine.<sup>1</sup>**

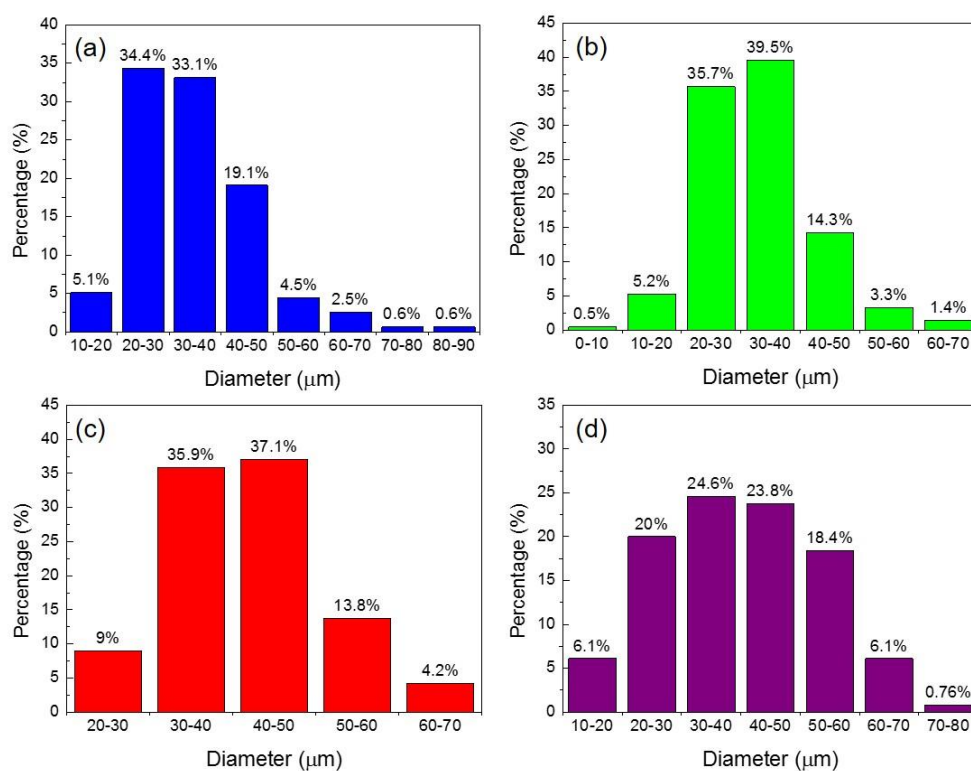

**Figure S2. Diameter distribution of (a) polybenzoxazine gel microparticles, (b) polybenzoxazine aerogel microparticles, (c) polyimide gel microparticles, and (d) polyimide aerogel microparticles.**

**Table S1. Values of  $i$  and  $n$  for different microparticles.**

|                                               | $i$ | $n$ |
|-----------------------------------------------|-----|-----|
| <b>Polybenzoxazine gel microparticles</b>     | 1   | 8   |
| <b>Polybenzoxazine aerogel microparticles</b> | 0   | 6   |
| <b>Polyimide gel microparticles</b>           | 2   | 6   |
| <b>Polyimide aerogel microparticles</b>       | 1   | 7   |

**Table S2. Diameter and shrinkage of gel and aerogel specimens.**

|                        | $D_0$ (mm) | $D$ (mm) | $\delta_d$ | $D_0'$ ( $\mu\text{m}$ ) | $D'$ ( $\mu\text{m}$ ) | $\delta_d$ |
|------------------------|------------|----------|------------|--------------------------|------------------------|------------|
| <b>Polybenzoxazine</b> | 12         | 9.41     | 21.6%      | 34.6                     | 32.7                   | 5.5%       |
| <b>Polyimide</b>       | 16         | 14.93    | 6.7%       | 41.8                     | 40.0                   | 4.3%       |

## Reference

1. Mahadik-Khanolkar, S.; Donthula, S.; Sotiriou-Leventis, C.; Leventis, N. Polybenzoxazine Aerogels. 1. High-Yield Room-Temperature Acid-Catalyzed Synthesis of Robust Monoliths, Oxidative Aromatization, and Conversion to Microporous Carbons. *Chem. Mater.* **2014**, *26*, 1303-1317.
